# Supplementary material for: Endogenous Nitric Oxide-Releasing Microgel Coating Prevents Clot Formation on Oxygenator Fibers Exposed to In Vitro Blood Flow
Source: MDPI journal article supplement (doi:10.3390/membranes12010073), 2022-01-06
Supplement: s1 [file s1]

# Endogenous nitric oxide-releasing microgel coating prevents clot formation on oxygenator fibers exposed to in vitro blood flow

Patrick Winnersbach <sup>1,†</sup>, Aisa Hosseinnejad <sup>2,†</sup>, Thomas Breuer <sup>3</sup>, Tamara Fechter <sup>1</sup>, Felix Jakob <sup>2</sup>, Ulrich Schwaneberg <sup>2,4</sup>, Rolf Rossaint <sup>1</sup>, Christian Bleilevens <sup>1,\*</sup> and Smriti Singh <sup>2,5,\*</sup>

- <sup>1</sup> Department of Anesthesiology, University Hospital RWTH Aachen, Pauwelsstraße 30, 52074 Aachen, Germany; pwinnersbach@ukaachen.de (P.W.); tfechter@ukaachen.de (T.F.); rrossaint@ukaachen.de (R.R.); cbleilevens@ukaachen.de (C.B.)
- <sup>2</sup> DWI—Leibniz-Institute for Interactive Materials e.V., Forckenbeckstr. 50, 52056 Aachen, Germany; hosseinnejad@dwirwth-aachen.de (A.H.); jakob@dwirwth-aachen.de (F.J.); singh@dwirwth-aachen.de (S.S.)
- <sup>3</sup> Department of Intensive Care and Intermediate Care, University Hospital RWTH Aachen, Pauwelsstraße 30, 52074 Aachen, Germany; tbreuer@ukaachen.de
- <sup>4</sup> Institute for Biotechnology, RWTH Aachen University, Worringerweg 3, 52074 Aachen, Germany; u.schwaneberg@biotec.rwth-aachen.de (U.S.)
- <sup>5</sup> Max-Planck-Institut für medizinische Forschung, Jahnstraße 29, 69120 Heidelberg, Germany
- \* Correspondence: cbleilevens@ukaachen.de (C.B.); smriti.singh@mr.mpg.de (S.S.)
- † These authors contributed equally to this work.

**Citation:** Winnersbach, P.; Hosseinnejad, A.; Breuer, T.; Fechter, T.; Jakob, F.; Schwaneberg, U.; Rossaint, R.; Bleilevens, C.; Singh, S. Endogenous Nitric Oxide-Releasing Microgel Coating Prevents Clot Formation on Oxygenator Fibers Exposed to In Vitro Blood Flow. *Membranes* **2022**, *12*, 73. <https://doi.org/10.3390/membranes12010073>

Academic Editor: Bettina Wiegmann

Received: 26 November 2021

Accepted: 28 December 2021

Published: 6 January 2022

**Publisher's Note:** MDPI stays neutral with regard to jurisdictional claims in published maps and institutional affiliations.

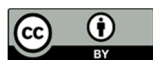

**Copyright:** © 2022 by the authors. Licensee MDPI, Basel, Switzerland. This article is an open access article distributed under the terms and conditions of the Creative Commons Attribution (CC BY) license (<https://creativecommons.org/licenses/by/4.0/>).

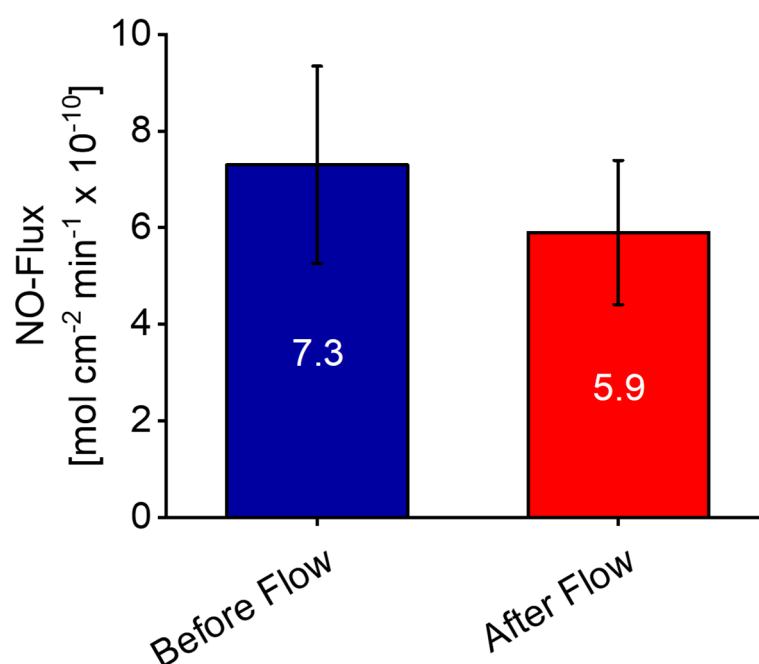

**Figure S1.** NO-flux profile from 1 × 1 cm<sup>2</sup> coated PMP fiber surface in the presence of the bioavailable concentration of L-Glutathione (GSH) (1 mM) and S-nitrosoglutathione (GSNO) (7 μM) before and after blood flow measured by Griess test at 30 min (n = 2–3).

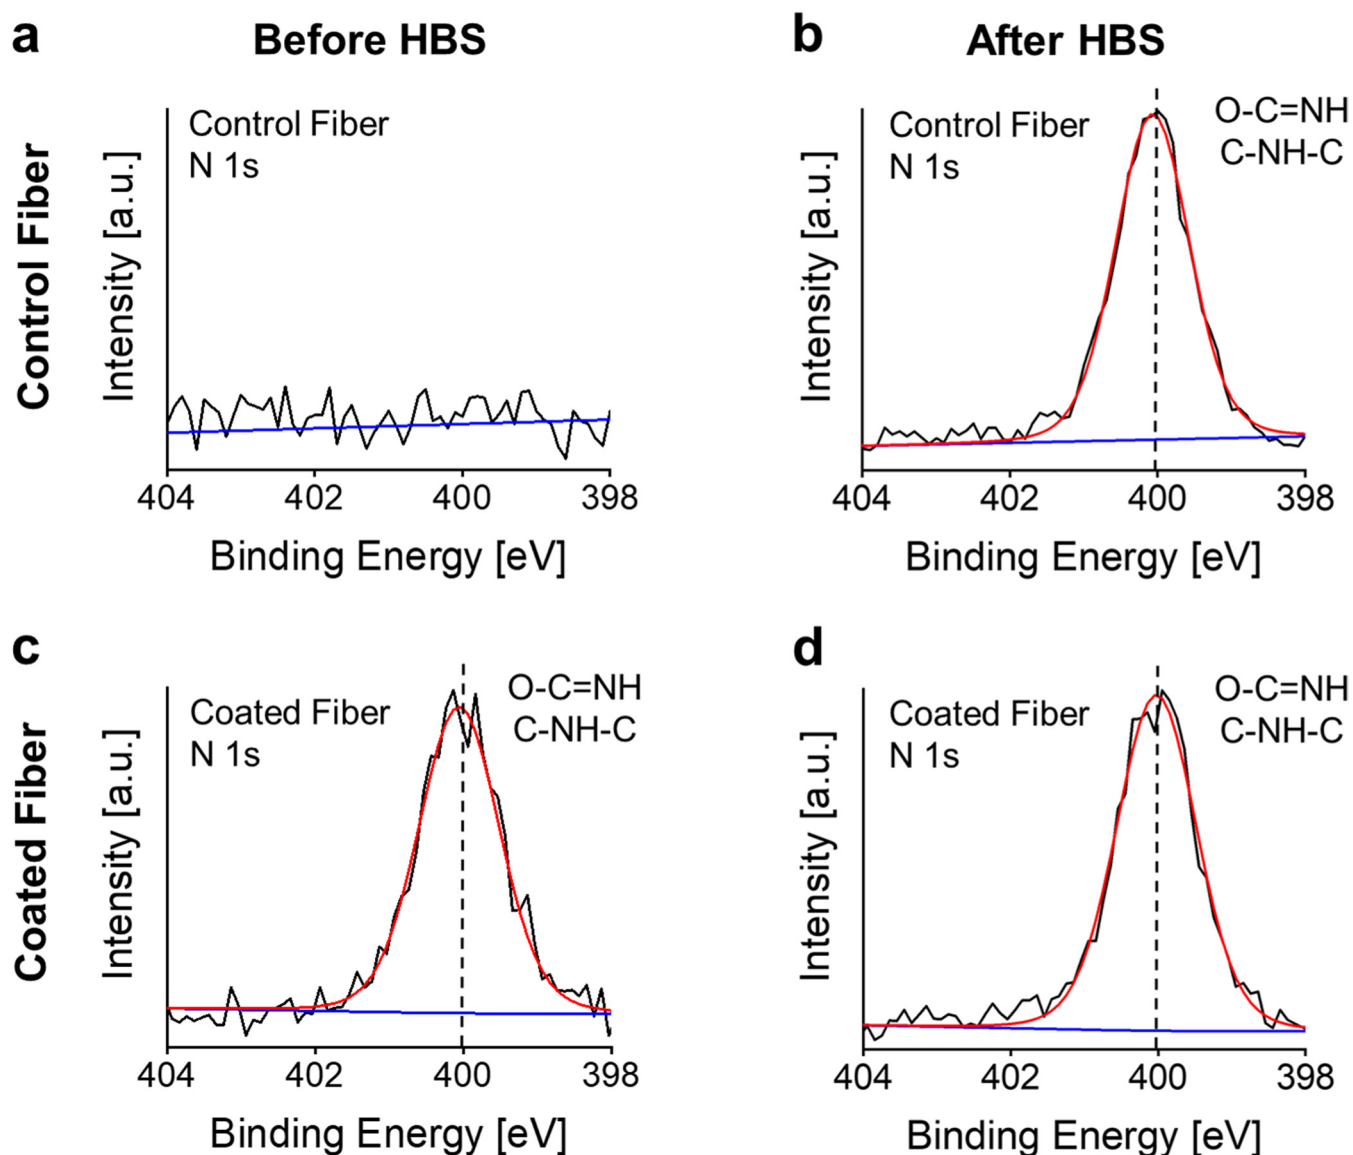

**Figure S2.** High resolution N 1s X-ray Photoelectron Spectroscopy (XPS) spectra of the control and coated fiber (a,c) before and (b,d) after exposure to human blood serum (HBS).

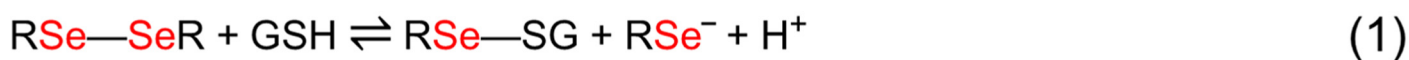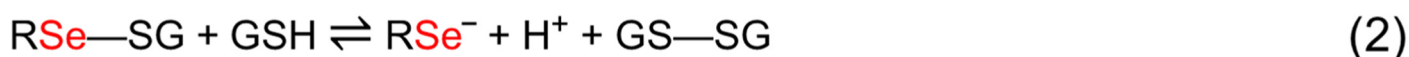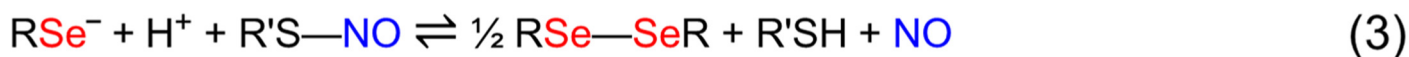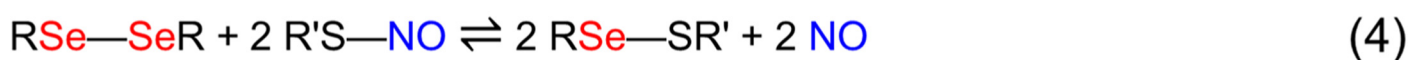

**Figure S3.** The proposed mechanism of NO-release from S-nitroso compound (R'SNO) by organoselenium catalyst (RSe—SeR) mediated by a reducing agent (L-Glutathione (GSH)). The other indicative species are selenosulfide (RSe—SR' and RSe—SG) and the conjugate base of selenol (RSe<sup>−</sup>).

**Table S1.** The elemental composition of the coated and control fibers before and after HBS.

|            | Coated Fiber |      |       | Control Fiber |      |       |
|------------|--------------|------|-------|---------------|------|-------|
|            | C            | N    | O     | C             | N    | O     |
| Before HBS | 62.0%        | 7.2% | 30.8% | 81.6%         | —    | 18.4% |
| After HBS  | 56.0%        | 7.5% | 36.5% | 57.7%         | 9.7% | 32.6% |
